# Supplementary material for: Etanercept embedded silk fibroin/pullulan hydrogel enhance cartilage repair in bone marrow stimulation
Source: PubMed Central journal article supplement (PMC9772014; doi:10.3389/fbioe.2022.982894), 2022-12-08

## Supplementary Material

### 1.1 Supplementary Figures

#### Figure legends

Figure.S1. The release curve of the etanercept in the hydrogel in vitro. The abscissa axis represents the time point of detection, and the vertical axis represents the released percent of etanercept.

Figure.S2. Normalized quantitative data from western blot assay of Col I, Col II, Col X, ACAN and SOX9 in hBMSCs.

Figure.S1.

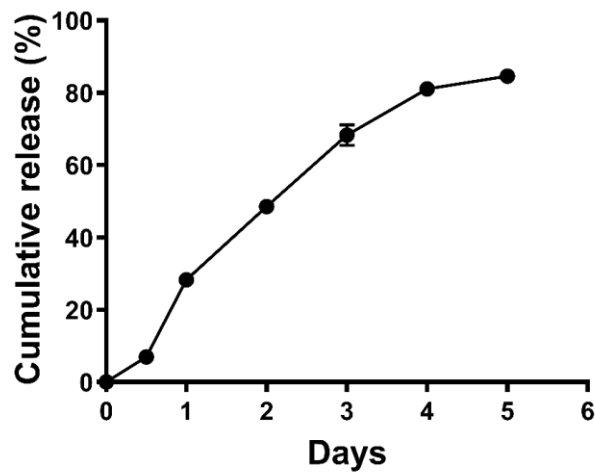

Figure.S2.

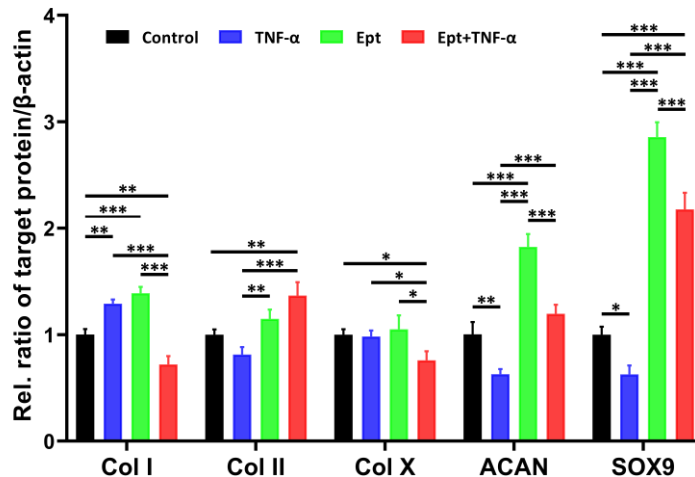

Supplement: DataSheet1.pdf [file DataSheet1.pdf]
